# Supplementary material for: Characteristics and correlation of the microbial communities and physicochemical factors from pit mud of Strong-flavor Baijiu
Source: Research Square preprint supplement (doi:10.21203/rs.3.rs-6186207/v1), 2025-04-17
Supplement: Supplementary file 1 [file b970384e0f475b841eeb6033.docx]

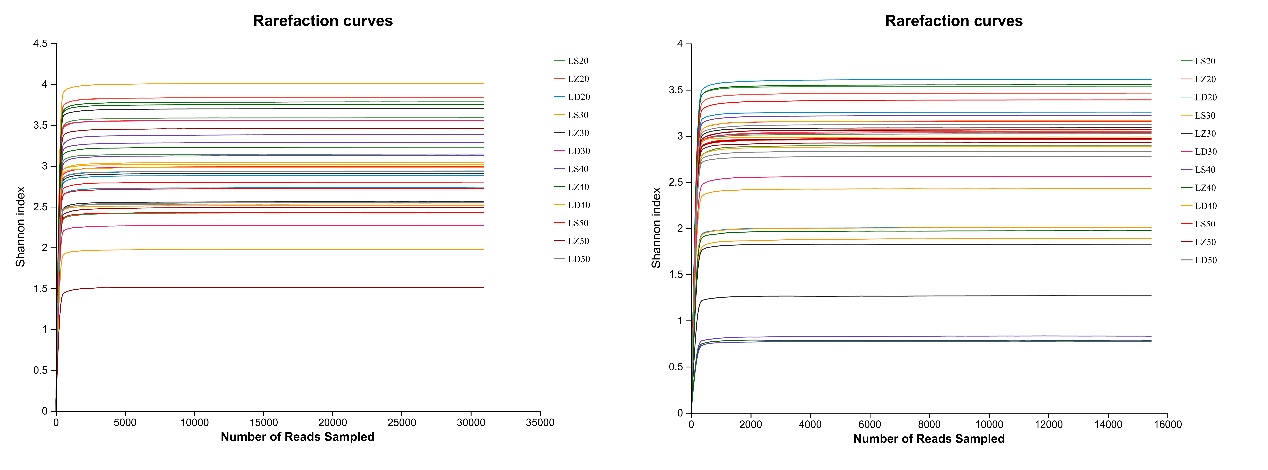


**Supplementary Figure 1.** T Dilution curves of prokaryotes (left) and fungi (right) in high-throughput sequencing.
